# Supplementary material for: The evolving privacy and security concerns for genomic data analysis and sharing as observed from the iDASH competition
Source: PubMed Central journal article supplement — J Am Med Inform Assoc. 2022 Sep 26;29(12):2182–90. doi: 10.1093/jamia/ocac165 (PMC9667175; doi:10.1093/jamia/ocac165), 2022-09-26
Supplement: ocac165_supplementary_data.pdf [file ocac165_supplementary_data.pdf]

**Supplementary Table ST1:** Summary of the iDASH competitions. AMIA: American Medical Informatics Association, ASHG: American Society of Human Genetics, DNA: DeoxyriboNucleic Acid, GA4GH: Global Alliance for Genomics and Health, GDS: Genomic Data Sharing, GWAS: Genome Wide Association Studies, HE: Homomorphic Encryption, SGX: Software Guard eXtension, SMC: Secure Multiparty Computation.

| Year | Venue ("Co-location")    | Participants (Countries) | Main Ref. | Competition Tracks and Peer-Reviewed Article References by Participating Teams |                                                                                                           |
|------|--------------------------|--------------------------|-----------|--------------------------------------------------------------------------------|-----------------------------------------------------------------------------------------------------------|
| 2014 | San Diego, CA            | 33 (2)                   | [1]       | 1                                                                              | Privacy-preserving data sharing for human genomes [2]                                                     |
|      |                          |                          |           | 2                                                                              | Secure release of analysis results for human genomes [3]                                                  |
| 2015 | San Diego, CA            | 56 (5)                   | [4]       | 1                                                                              | Secure outsourcing of human genome computation using HE techniques [5-7]                                  |
|      |                          |                          |           | 2                                                                              | Secure collaboration on human genome computation by using SMC techniques [8 9]                            |
| 2016 | Chicago, IL (AMIA)       | 50 (13)                  | [10]      | 1                                                                              | Practical protection of GDS through beacon services [11 12]                                               |
|      |                          |                          |           | 2                                                                              | Privacy-preserving search of similar cancer patients across organizations [13 14]                         |
|      |                          |                          |           | 3                                                                              | Testing for genetic diseases on encrypted genomes using public clouds [15-18]                             |
| 2017 | Orlando, FL (ASHG/GA4GH) | 65 (19)                  | [19]      | 1                                                                              | De-duplication for GA4GH [20]                                                                             |
|      |                          |                          |           | 2                                                                              | SGX-based whole genome variation search [21 22]                                                           |
|      |                          |                          |           | 3                                                                              | HE-based logistic regression model learning [23-25]                                                       |
| 2018 | San Diego, CA (ASHG)     | 64 (17)                  | [26]      | 1                                                                              | Blockchain-based immutable logging and querying for cross-site genomic dataset access audit trail [27-30] |
|      |                          |                          |           | 2                                                                              | Secure parallel GWAS using HE [31-35]                                                                     |
|      |                          |                          |           | 3                                                                              | Secure search of DNA segments in large genome databases [36 37]                                           |
| 2019 | Bloomington, IN          | 105 (21)                 | [38]      | 1                                                                              | Distributed gene-drug interaction data sharing based on blockchain and smart contracts [39 40]            |
|      |                          |                          |           | 2                                                                              | Secure genotype imputation using HE [41]                                                                  |
|      |                          |                          |           | 3                                                                              | Privacy-preserving machine learning as a service on SGX                                                   |
|      |                          |                          |           | 4                                                                              | Secure collaborative training of machine learning model                                                   |
| 2020 | Houston, TX              | 87 (22) Virtual          | [42]      | 1                                                                              | Secure multi-label tumor classification using HE                                                          |
|      |                          |                          |           | 2                                                                              | Privacy-preserving clustering of single-cell transcriptomics data in SGX                                  |
|      |                          |                          |           | 3                                                                              | Differentially private federated learning for the cancer prediction model                                 |
| 2021 | San Diego, CA (AMIA)     | 69 (15) Virtual          | [43]      | 1                                                                              | Data sharing consent for health-related data using contracts on blockchain                                |
|      |                          |                          |           | 2                                                                              | HE-based secure viral strain classification                                                               |
|      |                          |                          |           | 3                                                                              | Confidential computing                                                                                    |

**Supplementary Figure SF1.** Diagram of the total citation numbers (blue bars) of the 40 publications related to iDASH competition using Google Scholar [44] as of 4/20/2022. Also, the citations per year published are shown in the orange line.

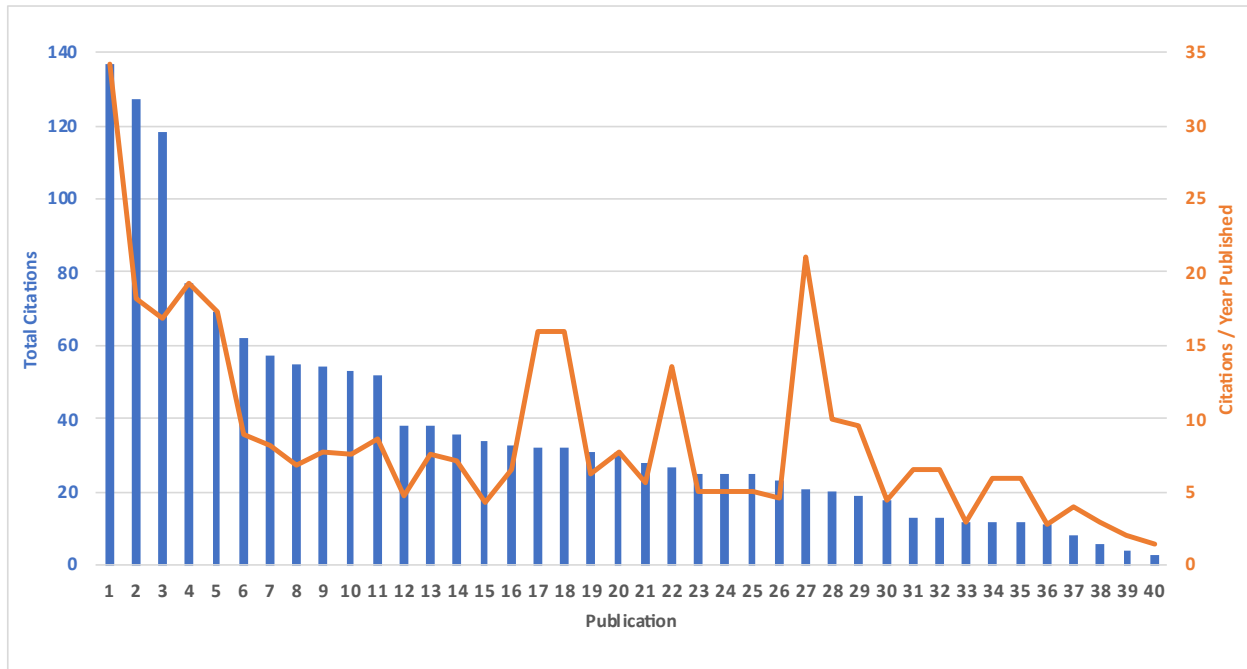

## REFERENCE FOR APPENDIX

1. Jiang X, Zhao Y, Wang X, et al. A community assessment of privacy preserving techniques for human genomes. BMC medical informatics and decision making 2014; **14** (1): S1.
2. Wang S, Mohammed N, Chen R. Differentially private genome data dissemination through top-down specialization. BMC medical informatics and decision making 2014; **14** (1): S2.
3. Yu F, Ji Z. Scalable privacy-preserving data sharing methodology for genome-wide association studies: an application to iDASH healthcare privacy protection challenge. BMC medical informatics and decision making 2014; **14** (1): S3.
4. Tang H, Jiang X, Wang X, et al. Protecting genomic data analytics in the cloud: state of the art and opportunities. BMC medical genomics 2016; **9** (1): 63.
5. Lu W-J, Yamada Y, Sakuma J. Privacy-preserving genome-wide association studies on cloud environment using fully homomorphic encryption. BMC medical informatics and decision making; 2015. Springer.
6. Kim M, Lauter K. Private genome analysis through homomorphic encryption. BMC medical informatics and decision making; 2015. Springer.
7. Zhang Y, Dai W, Jiang X, Xiong H, Wang S. Foresee: Fully outsourced secure genome study based on homomorphic encryption. BMC medical informatics and decision making; 2015. Springer.
8. Constable SD, Tang Y, Wang S, Jiang X, Chapin S. Privacy-preserving GWAS analysis on federated genomic datasets. BMC medical informatics and decision making; 2015. Springer.

9. Zhang Y, Blanton M, Almashaqbeh G. Secure distributed genome analysis for GWAS and sequence comparison computation. BMC medical informatics and decision making; 2015. BioMed Central.
10. Wang S, Jiang X, Tang H, et al. A community effort to protect genomic data sharing, collaboration and outsourcing. NPJ genomic medicine 2017; **2** (1): 1-6 doi: 10.1038/s41525-017-0036-1.
11. Wan Z, Vorobeychik Y, Kantarcioglu M, Malin B. Controlling the signal: Practical privacy protection of genomic data sharing through Beacon services. BMC medical genomics 2017; **10** (2): 39.
12. Al Aziz MM, Ghasemi R, Waliullah M, Mohammed N. Aftermath of bustamante attack on genomic beacon service. BMC medical genomics 2017; **10** (2): 43.
13. Wang XS, Huang Y, Zhao Y, Tang H, Wang X, Bu D. Efficient genome-wide, privacy-preserving similar patient query based on private edit distance. Proceedings of the 22nd ACM SIGSAC Conference on Computer and Communications Security; 2015.
14. Al Aziz MM, Alhadidi D, Mohammed N. Secure approximation of edit distance on genomic data. BMC medical genomics 2017; **10** (2): 41.
15. Çetin GS, Chen H, Laine K, Lauter K, Rindal P, Xia Y. Private queries on encrypted genomic data. BMC medical genomics 2017; **10** (2): 45.
16. Ziegeldorf JH, Pennekamp J, Hellmanns D, et al. BLOOM: Bloom filter based oblivious outsourced matchings. BMC medical genomics 2017; **10** (2): 44.
17. Sousa JS, Lefebvre C, Huang Z, et al. Efficient and secure outsourcing of genomic data storage. BMC medical genomics 2017; **10** (2): 46.

18. Kim M, Song Y, Cheon JH. Secure searching of biomarkers through hybrid homomorphic encryption scheme. *BMC medical genomics* 2017; **10** (2): 42.
19. Wang X, Tang H, Wang S, et al. iDASH secure genome analysis competition 2017. *BMC Medical Genomics* 2018; **11** (4): 85 doi: 10.1186/s12920-018-0396-0.
20. Laud P, Pankova A. Privacy-preserving record linkage in large databases using secure multiparty computation. *BMC medical genomics* 2018; **11** (4): 84.
21. Carpov S, Tortech T. Secure top most significant genome variants search: iDASH 2017 competition. *BMC medical genomics* 2018; **11** (4): 82.
22. Chen F, Wang C, Dai W, et al. PRESAGE: PRivacy-preserving gEnetic testing via SoftwAre guard extension. *BMC medical genomics* 2017; **10** (2): 48.
23. Kim A, Song Y, Kim M, Lee K, Cheon JH. Logistic regression model training based on the approximate homomorphic encryption. *BMC medical genomics* 2018; **11** (4): 83.
24. Chen H, Gilad-Bachrach R, Han K, et al. Logistic regression over encrypted data from fully homomorphic encryption. *BMC medical genomics* 2018; **11** (4): 81.
25. Bonte C, Vercauteren F. Privacy-preserving logistic regression training. *BMC medical genomics* 2018; **11** (4): 86.
26. Kuo T-T, Jiang X, Tang H, et al. iDASH Secure Genome Analysis Competition 2018: Blockchain Genomic Data Access Logging, Homomorphic Encryption on GWAS, and DNA Segment Searching. *BMC Medical Genomics* 2020; **13** (7): 98 doi: 10.1186/s12920-020-0715-0.
27. Gursoy G, Bjornson R, Green ME, Gerstein M. Using blockchain to log genome dataset access: Efficient storage and query. *BMC Medical Genomics* 2020; **13** (7): 1-9.

28. Pattengale ND, Hudson CM. Decentralized genomics audit logging via permissioned blockchain ledgering. *BMC Medical Genomics* 2020; **13** (7): 1-9.
29. Ma S, Cao Y, Xiong L. Efficient logging and querying for blockchain-based cross-site genomic dataset access audit. *BMC Medical Genomics* 2020; **13** (7): 1-13.
30. Ozdayi MS, Kantarcioglu M, Malin B. Leveraging blockchain for immutable logging and querying across multiple sites. *BMC Medical Genomics* 2020; **13** (7): 1-7.
31. Kim M, Song Y, Li B, Micciancio D. Semi-parallel logistic regression for GWAS on encrypted data. *BMC Medical Genomics* 2020; **13** (7): 1-13.
32. Carpov S, Gama N, Georgieva M, Troncoso-Pastoriza JR. Privacy-preserving semi-parallel logistic regression training with fully homomorphic encryption. *BMC Medical Genomics* 2020; **13** (7): 1-10.
33. Blatt M, Gusev A, Polyakov Y, Rohloff K, Vaikuntanathan V. Optimized homomorphic encryption solution for secure genome-wide association studies. *BMC Medical Genomics* 2020; **13** (7).
34. Kim D, Son Y, Kim D, Kim A, Hong S, Cheon JH. Privacy-preserving approximate GWAS computation based on homomorphic encryption. *BMC Medical Genomics* 2020; **13** (7): 1-12.
35. Sim JJ, Chan FM, Chen S, Tan BHM, Aung KMM. Achieving GWAS with homomorphic encryption. *BMC Medical Genomics* 2020; **13** (7): 1-12.
36. Sotiraki K, Ghosh E, Chen H. Privately computing set-maximal matches in genomic data. *BMC Medical Genomics* 2020; **13** (7): 1-8.

37. Hasan MZ, Mahdi MSR, Sadat MN, Mohammed N. Secure count query on encrypted genomic data. *Journal of biomedical informatics* 2018; **81**: 41-52.
38. iDASH Privacy & Security Workshop - Secure Genome Analysis Competition 2019. 2019. <http://www.humangenomeprivacy.org/2019/> Accessed May 29, 2020
39. Kuo T-T, Bath T, Ma S, et al. Benchmarking Blockchain-Based Gene-Drug Interaction Data Sharing Methods: A Case Study from the iDASH 2019 Secure Genome Analysis Competition Blockchain Track. *International Journal of Medical Informatics* 2021; **154**: 104559 doi: 10.1016/j.ijmedinf.2021.104559.
40. Gürsoy G, Brannon CM, Gerstein M. Using Ethereum blockchain to store and query pharmacogenomics data via smart contracts. *BMC Medical Genomics* 2020; **13**: 1-11.
41. Kim M, Harmanci AO, Bossuat J-P, et al. Ultrafast homomorphic encryption models enable secure outsourcing of genotype imputation. *Cell Systems* 2021; **12** (11): 1108-20.e4 doi: 10.1016/j.cels.2021.07.010.
42. iDASH Privacy & Security Workshop - Secure Genome Analysis Competition 2020. 2020. <http://www.humangenomeprivacy.org/2020/> Accessed June 2, 2020
43. iDASH Privacy & Security Workshop - Secure Genome Analysis Competition 2021. 2021. <http://www.humangenomeprivacy.org/2021/> Accessed February 22, 2022
44. Google. Google Scholar. <http://scholar.google.com/> Accessed September 28, 2020
